# Supplementary material
Source: ML conference proceedings conference paper supplement (https://openreview.net/forum?id=RSFpL35nIq)
Supplement: supplementary_material [file attachment]

# Supplementary Materials: X-Prompt

Anonymous Authors

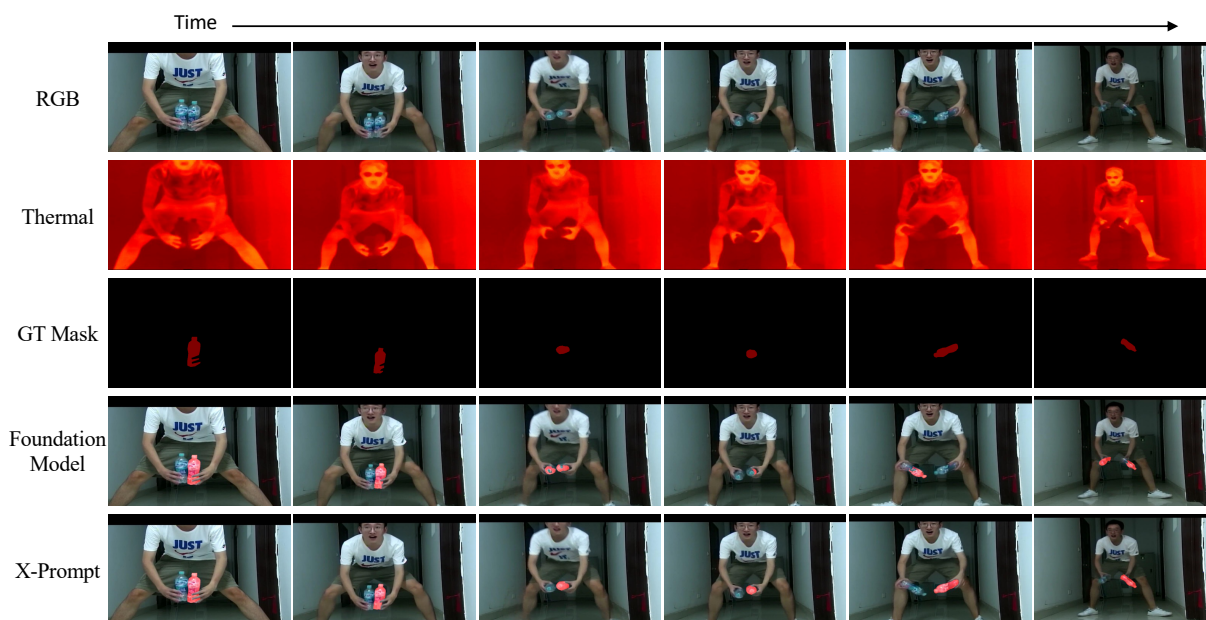

Figure 1: More qualitative results of RGB-T on VisT300 benchmark.

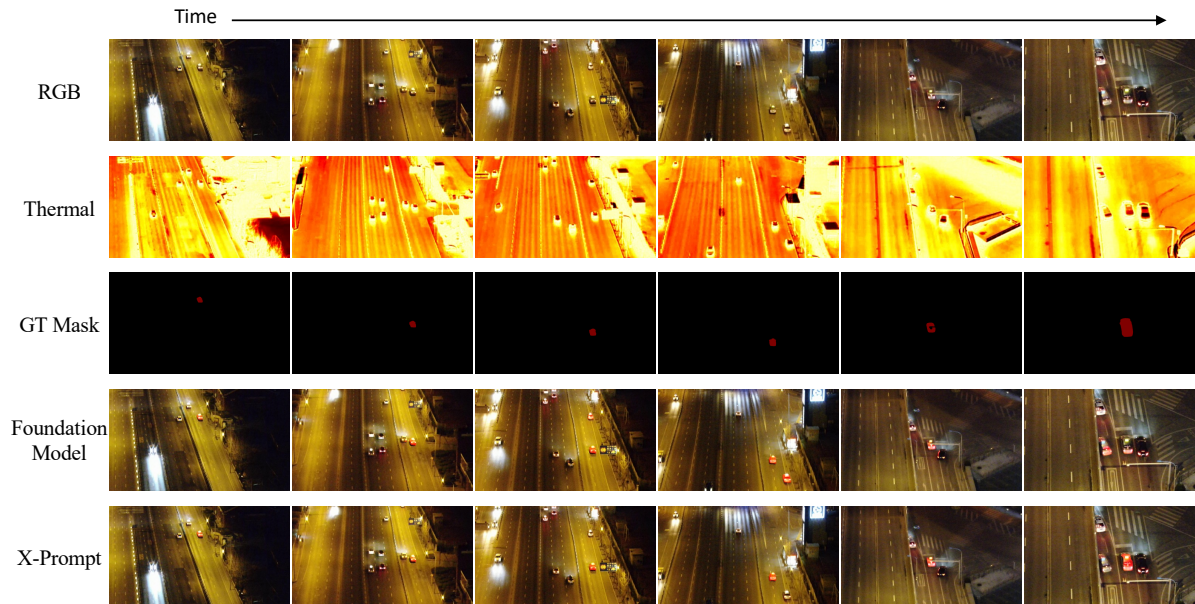

Figure 2: More qualitative results of RGB-T on VT-UAV benchmark.

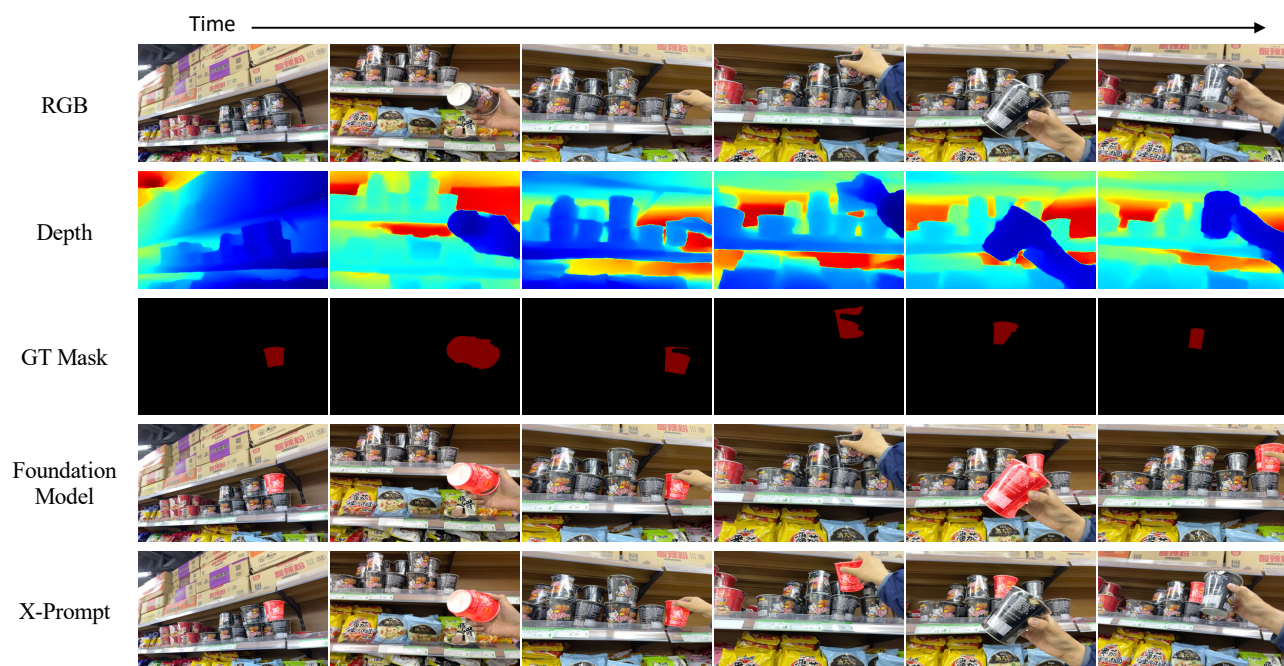

Figure 3: More qualitative results of RGB-D on ARKitTrack benchmark.

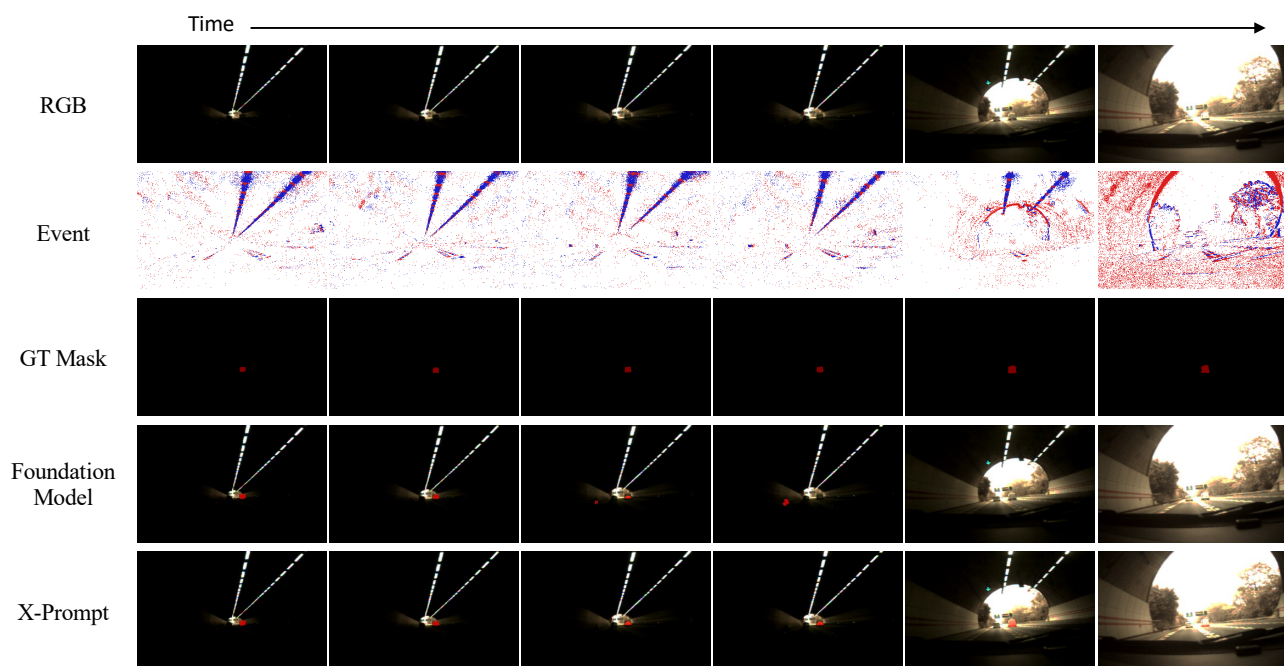

Figure 4: More qualitative results of RGB-E on VisEvent benchmark.
